# Supplementary material for: AlpArray in Austria and Slovakia: technical realization, site description and noise characterization
Source: Copernicus journal article supplement (doi:10.5194/adgeo-43-1-2016), 2016-10-07
Supplement: Supplementary file 1 [file adgeo-43-1-2016-supplement.zip]

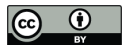

## Supplement of

# AlpArray in Austria and Slovakia: technical realization, site description and noise characterization

Florian Fuchs et al.

Correspondence to: Florian Fuchs (florian.fuchs@univie.ac.at)

- adgeo-43-1-2016-supplement-title-page.pdf
- PPSD\_plots
  - A001A\_HH2.png
  - A001A\_HH3.png
  - A001A\_HHZ.png
  - A002A\_HHE.png
  - A002A\_HHN.png
  - A002A\_HHZ.png
  - A003A\_HH2.png
  - A003A\_HH3.png
  - A003A\_HHZ.png
  - A004A\_HHE.png
  - A004A\_HHN.png
  - A004A\_HHZ.png
  - A005A\_HHE.png
  - A005A\_HHN.png
  - A005A\_HHZ.png
  - A006A\_HHE.png
  - A006A\_HHN.png
  - A006A\_HHZ.png
  - A007A\_HHE.png
  - A007A\_HHN.png
  - A007A\_HHZ.png
  - A008A\_HH2.png
  - A008A\_HH3.png
  - A008A\_HHZ.png
  - A009A\_HHE.png
  - A009A\_HHN.png
  - A009A\_HHZ.png
  - A010A\_HHE.png
  - A010A\_HHN.png
  - A010A\_HHZ.png
  - A011A\_HH2.png
  - A011A\_HH3.png
  - A011A\_HHZ.png
  - A012A\_HH2.png
  - A012A\_HH3.png
  - A012A\_HHZ.png
  - A013A\_HHE.png
  - A013A\_HHN.png
  - A013A\_HHZ.png
  - A014A\_HHE.png
  - A014A\_HHN.png
  - A014A\_HHZ.png
  - A016A\_HH2.png
  - A016A\_HH3.png
  - A016A\_HHZ.png
  - A017A\_HHE.png
  - A017A\_HHN.png
  - A017A\_HHZ.png
  - A018A\_HHE.png
  - A018A\_HHN.png
  - A018A\_HHZ.png
  - A019A\_HH2.png
  - A019A\_HH3.png
  - A019A\_HHZ.png
  - A020A\_HHE.png
  - A020A\_HHN.png
  - A020A\_HHZ.png
  - A021A\_HHE.png
  - A021A\_HHN.png
  - A021A\_HHZ.png
  - A024A\_HHE.png
  - A024A\_HHN.png
  - A024A\_HHZ.png
  - A331A\_HHE.png
  - A331A\_HHN.png
  - A331A\_HHZ.png
  - A332A\_HHE.png
  - A332A\_HHN.png
  - A332A\_HHZ.png
  - A333A\_HH2.png
  - A333A\_HH3.png
  - A333A\_HHZ.png
  - A334A\_HH2.png

- A334A\_HH3.png
  - A334A\_HHZ.png
  - A335A\_HHE.png
  - A335A\_HHN.png
  - A335A\_HHZ.png
  - A336A\_HH2.png
  - A336A\_HH3.png
  - A336A\_HHZ.png
  - A337A\_HHE.png
  - A337A\_HHN.png
  - A337A\_HHZ.png
  - A338A\_HH2.png
  - A338A\_HH3.png
  - A338A\_HHZ.png
  - A339A\_HHE.png
  - A339A\_HHN.png
  - A339A\_HHZ.png
- Station\_pictures
    - A001A.jpg
    - A002A.jpg
    - A002B.jpg
    - A003A.jpg
    - A004A.jpg
    - A005A.jpg
    - A005B.jpg
    - A006A.jpg
    - A007A.jpg
    - A008A.jpg
    - A009A.jpg
    - A010A.jpg
    - A011A.jpg
    - A012A.jpg
    - A013A.jpg
    - A014A.jpg
- A016A.jpg
  - A017A.jpg
  - A018A.jpg
  - A019A.jpg
  - A020A.jpg
  - A021A.jpg
  - A024A.jpg
  - A331A.jpg
  - A332A.jpg
  - A333A.jpg
  - A334A.jpg
  - A335A.jpg
  - A336A.jpg
  - A337A.jpg
  - A338A.jpg
  - A339A.jpg

The copyright of individual parts of the supplement might differ from the CC-BY 3.0 licence.
